# Supplementary material
Source: PubMed Central journal article supplement (PMC2876966)
Supplement: emboj201061s1.pdf [file emboj201061s1.pdf]

## SUPPLEMENTAL FIGURE LEGENDS

**FIGURE S1.** Clustal W alignment of BLM orthologs was performed using default parameters (<http://www.ebi.ac.uk/Tools/clustalw2/index.html>). Note that highlighting identifies similar residues. Sequence names include the aa residues used in the alignment: *Hs*, human; *Dr*, *Danio rerio*; *Ol*, *Oryzias latipes*; *Xl*, *Xenopus laevis*; *Gg*, *Gallus gallus*; *Dm*, *Drosophila melanogaster*; *Kl*, *Kluvermyces lactis*; *Sc*, *Saccharomyces cerevisiae*. (A) RecQ domains. (B) N-terminal domains. The BDHCT domain is underlined.

**FIGURE S2.** The indicated GST fusion proteins were subjected to EMSA but the reaction products were incubated for 30 min on ice with or without  $\alpha$ -GST prior to gel electrophoresis.

**FIGURE S3.** (A) SDS-PAGE analysis of purified recombinant proteins. Proteins were expressed and purified from bacteria with either an N-terminal GST-tag (GST) or a C-terminal V5-His6 tag (V5). Approximately 1.5  $\mu$ g of each recombinant protein was resolved by 15% SDS-PAGE and the gel was stained with Coomassie blue. Molecular weight standards are shown in kDa. (B) V5-His6-tagged N-terminal domains of BLM orthologs bind d(T)174. The indicated V5-His6-tagged proteins were assayed by EMSA as described in Fig.1D.

**FIGURE S4.** The SE domain lacks meltase and nuclease activity. (A) A SE reaction (1) was carried out using 1 nM of a  $^{32}$ P-labeled donor DNA with flush ends plus 5 nM of recipient oligo (lanes 1-9, 14). In reaction (2) the substrate consisted of 1 nM  $^{32}$ P-labeled oligo 6 alone (lanes 10-13). Both reactions were performed as described in the standard SE assay except that oligo 11 (25 nM final concentration) was added with the stop buffer in lanes 7-14 and incubated at 37°C for 30 min (3). (B) One nM of  $^{32}$ P-labeled oligo 6 or 1 nM of  $^{32}$ P-labeled dsDNA (oligo 6 plus 14) was incubated with the indicated amount of protein at 37°C for 30 min and analyzed as described in SE reaction.

**FIGURE S5.** (A) A SE reaction was carried out in the presence of Sgs1<sub>103-322</sub> and the indicated concentrations of Mg<sup>2+</sup>. (B) A SE reaction containing two potential recipient ssDNAs was carried out in the presence or absence of Mg<sup>2+</sup>. (C) Sgs1<sub>103-322</sub> was titrated into a SE reaction employing 10 nM flush-ended duplex as donor and 50 nM ssDNA as recipient. The products of the indicated reactions were quantified and its efficiency is presented as the percent of total signal present in the slower migrating band. Shown below these values is the ratio of molecules of ssDNA (in nucleotides) to molecules of protein used in the reaction.

**Table S1.** Oligonucleotides used in this study.

HsBLM/651-1417 651 HTKEMMKIFHKKFGLHNFRTNQLAENAAALLGEDCFILMPTGGGKSLCYQLPACVSPG ---VTVVISPLRS LIVDQVQKLTSLDIPATYLTGDKTDS EATNIYLQLSKKDP I I K LLYVTPEKICASNRLLISTLENLYE 785  
 DrBLM/662-1261 662 HSPEMMKIFHKKFGLHNFRTNQLAENASLLGEDTFLVLMPTGGGKSLCYQLPACVSAG ---VTVVISPLRS LIVDQVQKLTSLDIPATYLTGDKKDS EARIYMLQSRKDP I K LLYATPEKVCASGRMISALONLYE 796  
 OIBLM/630-1393 630 HSQEMMKIFHKKFGLHNFRTNQLAENAAALLGEDAFVLMPTGGGKSLCYQLPACVSPG ---VTVVISPLRS LIVDQVQKLTSLDIPATYLTGDKKDS EAGRIYMLQSRKDP I K LLYVTPEKVCASGRLLISALONLYE 764  
 XIBLM/603-1364 603 HSKEMMKIFHKKFGLHNFRTNQLAENACLCGEDCFILMPTGGGKSLCYQLPACVSPG ---VTVVISPLRS LIVDQVQKLTSLDIPATYLTGDKTDAEAS IYQLSKKDP I I K LLYVTPEKVCASGRLLISTMENLYE 737  
 GgBLM/422-1183 422 HSEMLKIFHKKFGLHNFRTNQLAENAAALLGEDCFILMPTGGGKSLCYQLPACVSAG ---VTVVISPLRS LIIDQVQKLTSLDIPATYLTGDIITDADASKYMLQSKKDP I I K LLYVTPEKVCASNRLLISALONLYN 556  
 DmBLM/721-1487 721 HSTRLMHGLSYSGFKLSFRPNQLQVINATLLGNDCFVLMPTGGGKSLCYQLPAILTETEG ---VTIVISPLRS LIFDQVQKLTSLDIPATYLTGDEQKMDVMAIYRDLESQPMVLLYVTEPKISSARFQDTLDTLNS 855  
 KIBLM/579-1367 579 WTS EYHKLRLHVFGLDSFRPNQLAVNATLQGGKDAFVLMPTGGGKSLCYQLPAIVKSGRTS GTTIVVSP LIS LMQDQV EHLAKD I K ASMFSSKGTAEARRMTFNLFMNG ---LLELVYISPEMIKASVQCKKAISKLYE 715  
 Scgs1/662-1447 662 WSD EYLYRLHEVFKLPGFRPNQLAVNATLQGGKDAFVLMPTGGGKSLCYQLPAIVKSGKTHGTTIVISPLIS LMQDQV EHLNKN I K ASMFSSRGTAEARRMTFNLFMNG ---LLELVYISPEMISASVQCKKAISKLYA 798

HsBLM/651-1417 786 AKLLARFVIDEAHCVSQWGHDFRPDYKRLNMLRQKFFSVPVMAITATANPRVQKIDILT LKILRPQVFSMSFNRRHLKYYVLPKKPKKVAFDLEWIRKHHPPYDSGIIYCLSRRECCTMADTLQRDGLAALAYHAGLS 924  
 DrBLM/662-1261 797 RGLLARLVIDEAHCVSQWGHDFRPDYKRLNMLRQKFFSVPVMAITATANPRVQKIDILT LKILRPQVFSMSFNRRHLKYYVLPKKPKKVAFDLEWIRKHHPPYDSGIIYCLSRRECCTMADTLQRDGLAALAYHAGLS 935  
 OIBLM/630-1393 765 RGLLARLVIDEAHCVSQWGHDFRPDYKRLNMLRQKFFSVPVMAITATANPRVQKIDILT LKILRPQVFSMSFNRRHLKYYVLPKKPKKVAFDLEWIRKHHPPYDSGIIYCLSRRECCTMADTLQRDGLAALAYHAGLS 903  
 XIBLM/603-1364 738 RQLLARFVIDEAHCVSQWGHDFRPDYKRLNMLRQKFFSVPVMAITATANPRVQKIDILT LKILRPQVFSMSFNRRHLKYYVLPKKPKKVAFDLEWIRKHHPPYDSGIIYCLSRRECCTMADTLQRDGLAALAYHAGLS 876  
 GgBLM/422-1183 557 AKLLARFVIDEAHCVSQWGHDFRPDYKRLNMLRQKFFSVPVMAITATANPRVQKIDILT LKILRPQVFSMSFNRRHLKYYVLPKKPKKVAFDLEWIRKHHPPYDSGIIYCLSRRECCTMADTLQRDGLAALAYHAGLS 695  
 DmBLM/721-1487 856 NNYLSRFVIDEAHCVSQWGHDFRPDYKRLNMLRQKFFSVPVMAITATANPRVQKIDILT LKILRPQVFSMSFNRRHLKYYVLPKKPKKVAFDLEWIRKHHPPYDSGIIYCLSRRECCTMADTLQRDGLAALAYHAGLS 994  
 KIBLM/579-1367 716 HGKLARIVVDEAHCVSQWGHDFRPDYKRLNMLRQKFFSVPVMAITATANPRVQKIDILT LKILRPQVFSMSFNRRHLKYYVLPKKPKKVAFDLEWIRKHHPPYDSGIIYCLSRRECCTMADTLQRDGLAALAYHAGLS 853  
 Scgs1/662-1447 799 DGKLARIVVDEAHCVSQWGHDFRPDYKRLNMLRQKFFSVPVMAITATANPRVQKIDILT LKILRPQVFSMSFNRRHLKYYVLPKKPKKVAFDLEWIRKHHPPYDSGIIYCLSRRECCTMADTLQRDGLAALAYHAGLS 936

HsBLM/651-1417 925 SARDEYVQKWINQDGCQVVCATIAFGMGIDKPDVRFVVIHASLPKSVVEGYQESGRAGRDGEISHCLLFYSYTHDVT LKRLIMMEKDNHHTRETHFNLLSMVHYCENITECRRIQLLAYFGENGFPDFCKHPDVS 1063  
 DrBLM/662-1261 936 SARDEYVQKWINQDGCQVVCATIAFGMGIDKPDVRFVVIHASLPKSVVEGYQESGRAGRDGEISHCLLFYSYTHDVT LKRLIMMEKDNHHTRETHFNLLSMVHYCENITECRRIQLLAYFGENGFPDFCKHPDVS 1074  
 OIBLM/630-1393 904 SARDEYVQKWINQDGCQVVCATIAFGMGIDKPDVRFVVIHASLPKSVVEGYQESGRAGRDGEISHCLLFYSYTHDVT LKRLIMMEKDNHHTRETHFNLLSMVHYCENITECRRIQLLAYFGENGFPDFCKHPDVS 1042  
 XIBLM/603-1364 877 SNRDYVQKWINQDGCQVVCATIAFGMGIDKPDVRFVVIHASLPKSVVEGYQESGRAGRDGEISHCLLFYSYTHDVT LKRLIMMEKDNHHTRETHFNLLSMVHYCENITECRRIQLLAYFGENGFPDFCKHPDVS 1015  
 GgBLM/422-1183 696 SNRDYVQKWINQDGCQVVCATIAFGMGIDKPDVRFVVIHASLPKSVVEGYQESGRAGRDGEISHCLLFYSYTHDVT LKRLIMMEKDNHHTRETHFNLLSMVHYCENITECRRIQLLAYFGENGFPDFCKHPDVS 1131  
 DmBLM/721-1487 995 TDRSRLQKDWLTG-KMRVVCATIAFGMGIDKPDVRFVVIHASLPKSVVEGYQESGRAGRDGEISHCLLFYSYTHDVT LKRLIMMEKDNHHTRETHFNLLSMVHYCENITECRRIQLLAYFGENGFPDFCKHPDVS 1063  
 KIBLM/579-1367 854 DERFQVQDQWAD-RVQVVCATIAFGMGIDKPDVRFVVIHASLPKSVVEGYQESGRAGRDGEISHCLLFYSYTHDVT LKRLIMMEKDNHHTRETHFNLLSMVHYCENITECRRIQLLAYFGENGFPDFCKHPDVS 1063  
 Scgs1/662-1447 937 DERFQVQDQWAD-RVQVVCATIAFGMGIDKPDVRFVVIHASLPKSVVEGYQESGRAGRDGEISHCLLFYSYTHDVT LKRLIMMEKDNHHTRETHFNLLSMVHYCENITECRRIQLLAYFGENGFPDFCKHPDVS 1063

HsBLM/651-1417 1064 DNCCKTK--DYKSRDVTDDVGNIVRFVQEHSSQGMNRNIKHVGSGRFTMMLVDIFLGSKSAKIQTG-----IFGKGSAYSRHNAERLFRKLVLDRIIDEDLYITANDQAVAYVVLGNAQAVLNGFLKVDQDTE 1194  
 DrBLM/662-1261 1075 DNCCKTK--DYKSRDVTDDVGNIVRFVQEHSSQGMNRNIKHVGSGRFTMMLVDIFLGSKSAKIQTG-----IFGKGSAYSRHNAERLFRKLVLDRIIDEDLYITANDQAVAYVVLGNAQAVLNGFLKVDQDTE 1204  
 OIBLM/630-1393 1043 DNCCKTK--DYKSRDVTDDVGNIVRFVQEHSSQGMNRNIKHVGSGRFTMMLVDIFLGSKSAKIQTG-----IFGKGSAYSRHNAERLFRKLVLDRIIDEDLYITANDQAVAYVVLGNAQAVLNGFLKVDQDTE 1172  
 XIBLM/603-1364 1016 DNCCKTK--DYKSRDVTDDVGNIVRFVQEHSSQGMNRNIKHVGSGRFTMMLVDIFLGSKSAKIQTG-----IFGKGSAYSRHNAERLFRKLVLDRIIDEDLYITANDQAVAYVVLGNAQAVLNGFLKVDQDTE 1145  
 GgBLM/422-1183 835 DNCCKTK--DYKSRDVTDDVGNIVRFVQEHSSQGMNRNIKHVGSGRFTMMLVDIFLGSKSAKIQTG-----IFGKGSAYSRHNAERLFRKLVLDRIIDEDLYITANDQAVAYVVLGNAQAVLNGFLKVDQDTE 965  
 DmBLM/721-1487 1132 DNCCKTK--DYKSRDVTDDVGNIVRFVQEHSSQGMNRNIKHVGSGRFTMMLVDIFLGSKSAKIQTG-----IFGKGSAYSRHNAERLFRKLVLDRIIDEDLYITANDQAVAYVVLGNAQAVLNGFLKVDQDTE 1256  
 KIBLM/579-1367 987 DNCCKTK--DYKSRDVTDDVGNIVRFVQEHSSQGMNRNIKHVGSGRFTMMLVDIFLGSKSAKIQTG-----IFGKGSAYSRHNAERLFRKLVLDRIIDEDLYITANDQAVAYVVLGNAQAVLNGFLKVDQDTE 1112  
 Scgs1/662-1447 1070 DNCCKTK--DYKSRDVTDDVGNIVRFVQEHSSQGMNRNIKHVGSGRFTMMLVDIFLGSKSAKIQTG-----IFGKGSAYSRHNAERLFRKLVLDRIIDEDLYITANDQAVAYVVLGNAQAVLNGFLKVDQDTE 1195

HsBLM/651-1417 1195 SSSVKKKQ-----ALVAK-VSQEEMVKKCLGELT EVCSSLGKVFQ-----VHYFNIFNTVTLKKLAESLSSDPEVLLQIDGVTEDKLEKYGAEVISYLQKYS EWTSPAED-----SSPGIS 1300  
 DrBLM/662-1261 1205 ASSIRKKH-----ASVCEKVSKEEMVKKCLGELT EVCSSLGKVFQ-----VHYFNIFNTVTLKKLAESLSSDPEVLLQIDGVTEDKLEKYGAEVISYLQKYS EWTSPAED-----SSPGIS 1261  
 OIBLM/630-1393 1173 ASSIRKKH-----ASVCEKVSKEEMVKKCLGELT EVCSSLGKVFQ-----VHYFNIFNTVTLKKLAESLSSDPEVLLQIDGVTEDKLEKYGAEVISYLQKYS EWTSPAED-----SSPGIS 1227  
 XIBLM/603-1364 1146 ASSIRKKH-----ASVCEKVSKEEMVKKCLGELT EVCSSLGKVFQ-----VHYFNIFNTVTLKKLAESLSSDPEVLLQIDGVTEDKLEKYGAEVISYLQKYS EWTSPAED-----SSPGIS 1252  
 GgBLM/422-1183 966 ASSIRKKH-----ASVCEKVSKEEMVKKCLGELT EVCSSLGKVFQ-----VHYFNIFNTVTLKKLAESLSSDPEVLLQIDGVTEDKLEKYGAEVISYLQKYS EWTSPAED-----SSPGIS 1071  
 DmBLM/721-1487 1257 AKEAAAVGSVSDGATSTADGSGMREIHERCYTDLDDLCRTIASQRN-----VTMASIMNIQALSKMAETLPITEKDMCSPHVTKANFDXYGAKALLEISNYSKELLMQA-----VLDEEE 1371  
 KIBLM/579-1367 1113 EETTGSNR--YSDKNKGEAAHNSARAISGSLT DKSNAVLSLTPNYSRSFTTNSSDIHPSAKDHIHFRFYS EADARSAPVQLTNGSVSYSSQEAHAITKCFNLLKDAINVS SKNFNPNDTMLISDAI LWKAANK 1249  
 Scgs1/662-1447 1196 APNRPST--SSSFQANE-----DNIRVIAQSTTIGGNVAANPRFIS-----AKEHLRSYTYGGTMSGSHRITLKNSTDLRSTQELNNLRMYERLRELSLNLGNRMVPPVG-NFMPDSILKKMAAI 1312

HsBLM/651-1417 1301 LSGSRGPGRAAAEELDEEIPVSSHFEASKTRNERKRR-----KMPASQRKRRRTASSGSKAGGSATCRKISSKTKSSSIIGSSASHTSQATSGANSKLGIMAPPKPI--NPPFLKPSYAFS---- 1417  
 DrBLM/662-1261 1278 --AGEGWIDITRGRQDDEDESSTYFSNRSAQGGKRR-----KAPFFKYSKRRKGFNASSNSRGNSSKSWSSSSSRGSSQA--AGRGSRNAGDPPAGRRPGILAAPT PQSKQRPFLKPSFSHIS---- 1393  
 OIBLM/630-1393 1253 GPANVSARRNSD-HDDESCKSSYFSSNNKKGPKRR-----NSSYFGKSKRRKTGGDQQQS SKNGNSYARKNSTAK-----TSSSYISGSKGADKRPGFMAPPMPQP-NRRFLKPSYSME---- 1364  
 XIBLM/603-1364 1072 TAPG-SAGTPGSEEAADDVVTSSYFGGNARQRRKRR-----RLPNSGSKRRKTSGGGQQFYSGKARYRRARRAPGS--RAAAPAQSAALRGAGARLGIMAPPKPS--SHFLQPSYAVL---- 1183  
 GgBLM/422-1183 1372 EQAAAKQRPSTSGWNNSVWDMAVASQGNANTSGAS-----GFNFRAGRKKKIYSGASKRYKTSTTSPARKTT SARG--RGRAGAKRAESASSAGWSKSKT GNSFGFDLMLPGSK----- 1487  
 KIBLM/579-1367 1250 LPADQASAFANLGSNDPALAKRFKYFSATLKKCKKER-----HHIIVVSSDLSLPTTETETGDSSEYFNG--NEGIDDSAVISQIEIMFASSSTSQNATLSQ-KRSKPKASGGRWKSWK--YSKRK 1367  
 Scgs1/662-1447 1313 LPMNDSAFALGTVEYKYYRRFKYFKAT IADLSKRRSSEDHEKYDTILNDEIVNRAAASNGIAQSTGTGSKFFGANLKEADEQVINSQIRQSQLEKNTTSSKSGTRSLSKSSKKSANGRGGRFNGYRGRGRK 1447

Figure S1a

*HsBlm/1-651* 1 --MAAVPQNNLQERHSARTLNNKLSLSPKPKFSGFTFKKKTSSDNNVSVTVNSVAKTFLVLRNKDVTEDFS-----FSEPLPNTNQQRVKDFFKNAPAGQETQRGGSKLLPDLQ 114  
*DrBlm/1-662* 1 --MSSLPQNNLKEHLERHNNAAQN-KLSLLKPKPGGFCFKKSSSGISKVEVPQKVTGSSVLANRSVNI PSNFVETKNPVTFSQKPERVAP-KVN-FFTAPSK-PKNTVNPPLANFALNKT 116  
*OIBLM/1-630* 1 --MSSLPQNNLEELARHNNANQS-KLSLAKPKTGAFLLKKKSTSGTINVEYPAKVTAASSVLANNRVNPKNSLLTKSSVTFSNKLERTQKSKINSFFT VNSK-CQSDSVI PACR-----NP 113  
*XIBLM/1-603* 1 --MAALPQNNLQKLELPAKGTSNKLSLQTKSSSVFTFKKCSFNVS-ASTGFIFQQHVLKDKNVNVKQD-----GTHTALPKATERNKINCFFT VYT-KSGQPPQVVAL-----K 105  
*GgBlm/1-659* 1 MEEARAATNGGSGESQKLSNGEKSSQLPEPDVGNELLADIELEEDDYLDVVPPSPPEELPSFSSVRNVSNI FK-----ESPTDGRSAVHGTSEPELMAKQPAAEQDSSAEHADKG-----L 114  
*DmBlm/1-704* 1 --MSKKPVAQRKQLTLSFIFGLDGSQPKPSRAASVRSKPPAVYNPIFLDASSSDDETT EISSQSNGT IATKKSSRDPRATKLKHTYLDLSVSP LAELSAKKYARDSPPKPTSLDLSVS 120  
*KIBLM/1-621* 1 --MVKPSHNLRRERHKWLKDT EAYLPDKSVLGLLQKHVTAKSATLNSGVENDLARRTGSTLDQVPRNLTSMPVSS-GAVTTAQTAVAGTWDEGSYNTT IAVATVLDSDGDSLEL IADR 118  
*ScSgs1/1-674* 1 --MVTKPSHNLRRERHKWLKETATLQEDKDFVFOAIQKHIANRPKTNSPPTT PSKDECGPGT TNFITSIPASGPTNTATKQHEVMQTL SNTDTEWLSYATSNQYADVPMVDIPASTSVVSNP 120

130 140 150 160 170 180 190 200 210 220 230 240  
*HsBlm/1-651* 115 PKEVVCTTQ-----NTPTVKKSRDTALKKLEFS SPDSLSLTNDWDMDDFDTSSETS---S FVTTPQSHFVRVSTAQK--SKKGKRNFFKAQLYTNTVKTDLPPSSSEEQIDLT EEQK 225  
*DrBlm/1-662* 117 PLVQSTIKA-----LPKSAALPKDSTNDQTVLKHDI SLSFNEWDDLDDFETPVKSR--VAPVAGTSTKKPSVSD-----QNTSSSCSSKCEETKVNEESQATETITAPKDVLSAANG 224  
*OIBLM/1-630* 114 PAVSGNNGA-----ITQTKT--DNHSINATNAPSFDPSQFLDDWDDFDDFETPVKT---ND SFS SGKVTKPS PDEEFPEFTGKQSDTSHTVPEL IIEDDQPCMEIKEPEH IVSNNST 224  
*XIBLM/1-603* 106 DHVHGNDSA-----NKPPST--EDAASKTGINTSFGSVTSL EEWDDLDDFDTSWSP--KS HAKGGKTPQKCKNT-----SPVASFKIQSISPEGPTTEKHDCAKLLYDNNEVAS EPR 211  
*GgBlm/1-659* 115 HLEQKLYSV-----MEDICKLVDAIPLHELTSISCAKELLQORELRRKLLADSGALNT--NSVNGPRNWKACVQDDPSRPGTLLCSGPGRGVSVGSTPKSTNLPSVLSRTVNS SFS 227  
*DmBlm/1-704* 121 PLAELPAKK-----SDRDPPPKPVQNNESYTYRGLSESPVENKSI GDTLRKPPPKERK--TS IWLSDSP EKKVTQNERKILDSLQRF SFEDFPNKENGNRHLLT LSDSPPPPPQPVKK 233  
*KIBLM/1-621* 119 PSANNSNV-----SSITAQITQKT EINTNGKTSDDQLHRLVSLWQQ--SELQEK--CEILESTSLSQDNKRSKISGFINPTLNR I KQQISAMDNL LPSLPQARAVPDLOSFP AVSR 229  
*ScSgs1/1-674* 121 RTPNGSKTHNFNTFRHMASSSLVENDSSRNLSGRNNSVINDSSIGKQLENDIKLEVIRLQGS LIMALKEQSKLLLQKCSI IESTSLSEDAKRLQLSRDIRQLSNMSIRIDSLKEI IKA 242

250 260 270 280 290 300 310 320 330 340 350 360  
*HsBlm/1-651* 226 DDE---WLS DVLICIDGGPIAEVHINEDAESDSLKTHLEDE-----RDNSEKKNLEEAEHST EKVPCIEFDDDDYD-----TDFVPPSP EELISASSSSKCLSTLKDLDTS DR 330  
*DrBlm/1-662* 225 VS-----TETAEREPEDSPIKSKRKKSVQHTALLSDTEDEE IHCVS PDTNOKNFKSVAVA EKDKWGEFNVISDDCEENNHYEGFEDFIPPSPIPEEISLSVSDKEKSSSEVP TPANK 340  
*OIBLM/1-630* 225 VSPGPGILQETVQFEVEDSPVRGTR--RPF EHKSVLSDSE-----DTN VVEKIETKSDGKKWIDPKVIELQDNS E-----EVD FDCIPSPDTP ETSYTSALQTRSKTGKTQSRF 332  
*XIBLM/1-603* 212 KN-----LHAKTAESPQD-SLVCLASVEPTNLERDMCR-----NTDYLGTDLLEHQETLSQVLI EEDDC E-----DFIPPSSPDESLSPPVLKVIS AQRKHKVSSL 305  
*GgBlm/1-659* 228 IR-----NQTLDKLDTSSSKETDQEVICLEPAALPSPKVNKG-----GSTSLSRPSEAS FNGSWCEKPTGRSGNWRVPERPTASTALKAQHTAPAGNPASGCWDVNDTDFDLDFDI 336  
*DmBlm/1-704* 234 PEKT-MWQNEKTITQDKDSPANPLVSNLASISTLLDSRAPN-----TYKGS RNLFE DSP EKS GSGEQGNKLSAKEN EIPTKPATAS LERN SVTSSPS PAAPLKPRYSVAFDNLADY 348  
*KIBLM/1-621* 230 NAS-----ASLSRRNSPTPHATESVNPISSEDIDIDPS-----SQTQLTQHNSSSPKIQPSRRLRRHDPNQ-----YYIPTLSQMDEPHLLQESLLSKRRRTSTN-- 323  
*ScSgs1/1-674* 243 KKG---MSKDQKGRSQVSSQDDNIISILPSPLEYNTSSRN-----SNLSTTATTVTKALAITGAKQNTNTGKNSNNDSSND DLIQVLDDEDIDICDPPVILKEGAPHSAPFPH 353

370 380 390 400 410 420 430 440 450 460 470 480  
*HsBlm/1-651* 331 KEDVLSTSKDLLSKPEKMSMQELNPETSTDCDARQISLQQQLIHVMEH-ICKLIDTIPDD-KLKLLDCGNELLQQRNIRKRLLEVD FNKSDAS-----LGLSLWRYRPDSLDGPMEGD 442  
*DrBlm/1-662* 341 KE-----SSRSASGLPAPLDQSAKG--LKGADDALFSVMES-ICCLVDTIPEH-ELIALTCGTELLLQRAHRKRILAKGGSSRTSHSDSVSTPGFLNRPRTFGVTPSNLTLTPVT 446  
*OIBLM/1-630* 333 FS-----AQSKSSAPTRPEFSLCLIS--KNSTREQLYSIMES-ICALVDSIPEH-ELISLSCGNELLRLRAHRKRILATGGDFSFRMQQPDST--VISDASFKETSS-CCVLT PSS 435  
*XIBLM/1-603* 306 TD-----VNDCENTTDHLOGQSVSTSLDSKVP SQLLTLMLE-ICDLVOKIPI S-ELHVLS CGLDLKKKRDMDRKRLLSNDSVFRSSPADSSTVS--LT SCTSTQNRD FNVNAPKG 411  
*GgBlm/1-659* 337 DDFDEG--WEEAVAP EAAPEAPPAPWQPLREGSASLRCLLAAAAGS-APGPHDTPAPKSGCGISAKSS EPLVHNPAHERFRGMKFS EEMLKI FHRKFGLHSFRTNQLEIA NAALLGED 455  
*DmBlm/1-704* 349 LKDLAQ-----NDNFSIDPNKNTETLKSTLGFFRNTYVELMEK-YCSLIDQIPAMHFNEIAGFQNPFLKLKVVQRKFKARTQLVQNSLDKKESQLKAEQEALEKEEIEAMAEQARQ 460  
*KIBLM/1-621* 324-----NNIHNDNDSDASAEAESD SHFLTMEE-DQIYDNELHESDKDFVVDGNYLDYDEGPEADAEYHEEDDSNVPEFEKERSNQI I IDSSPGSSPRHLNPPSQPP 425  
*ScSgs1/1-674* 354 LHMTSE-----EQDELTRRRNMRSEPVNYRIPDRDDPFDYVMGKSLRDDYPDVEREDELTEMAEDDAHSSYMTTRDEEKEENELLNQSDDFVVDNDLDPTQD TDYHDNDV SANIQ 467

490 500 510 520 530 540 550 560 570 580 590 600  
*HsBlm/1-651* 443 SCPTGNSMKELNFSHLPSNSVSPGDCLLTTTLG-----KTGFSATRKNL FERPLFN-----THLQKSEFVSSNWA-----ETPRLGKKNESSYFGPNVLTSTAVKDQNKHTASINDL 543  
*DrBlm/1-662* 447 SGKREGVKTGFSERKSIASVMSVGDSEVFEDSDCIINGVETPGGTWNPNNSSTKISAGRTFNGSIQTLSKPESKTDKCYSR--LSFNNESSQTDLLFYS PKRWDSGRNADSSVEIN IAGSS 565  
*OIBLM/1-630* 436 SAVLDSRKSQQRRP--SVISLDYDSDHSDR-----TAFNPLSSKSSRAICVEDESIC--DSLSTPRLLKQPCFS-----ESTSRLEDDEDAHFFSPKKPVSV EQNKSKTPTCTTADNT 539  
*XIBLM/1-603* 412 AESLSGSSSVKVFENKLA VHDIGTKESANS-----SAPNFM EKI GNKTSFS-----FRAGGDSIMENSFN-----FHSSVLSNSRFNT PQNEKPISSSTCTRPYSQPIDDM 510  
*GgBlm/1-659* 456 CFILMPTGGGKSLCYQLPACVSA GTVVISPLR-----SLIDQVQKLRLDIASTYLTGDI TDADASKTY--MQLSKDDPIKLLYVPEKVCASNRLLSALENLNRKL 559  
*DmBlm/1-704* 461 TVLSSSSPEKCRPIMPLPKVQEKIDKEKIPNRNQLIPDLCEP DNFSPPSSPRDTQLIPKRQQLINDLCEGDDPSPSPSKQNDPHLLRKCEELVHDLCEEPDDYLAQSMMLDGL EEEQLNGP 582  
*KIBLM/1-621* 426 LQQQTQNTSQEFQPTQLRLLLDDDDVFELEDPIS-----ESLPQDHTVAVHSEEFELSDTDLEF DAEREDQ-----TQFDEIKELDDDLKILSEAKLDAEDVPLSFAIKKE 528  
*ScSgs1/1-674* 468 ESSQEGDTRSTITLSQKNVQVILSSPTAQSV-----SNGQNGVGEHIDLLEDDLEKDAI LDDSMSFSFGQRHMPMSHSDLELIDSEKENEDFEEDNNNGIEYLS DSD 573

620 630 640 650 660 670 680 690 700 710 720 730  
*HsBlm/1-651* 544 ER-----ETQPSYDIDNFDIDDDDDDDWED-----IMHNLAASSSTAA YQPIKEGRPIKSVSERLSSAKTDCLPVSSTAQNTNFSIQNYTDKSAQNLASRLNKHERRFQSLSPH 651  
*DrBlm/1-662* 566 SLRT--GAEPVDDFLLDDFIDDDFEND-----IPDYEEPPSSVLESRNNS-----GVKTPSVQEGGSSKS-FERK-TFTPPAPKSIKTPNPEPLRYNPAHDRFRGFNFPH 662  
*OIBLM/1-630* 540-----ETDDFYDDFIDDDFDES-----IPEYEEAPTSSVPRQS-----STAT-AVKEGGPSKSSWDKKPSSSVSTPKPKKLCSEPTFRNPAHDRFRGFNFPH 630  
*XIBLM/1-603* 511 D-----NPOLDFDIDNFDIEDLDDIH-----CLDSP-AAPSVSSKNVPQ-----YPTIREAQLDSSNRKEKNTNRNTGDTTNPSLLSDSLLPQIENPAHERFRGFNFPH 603  
*GgBlm/1-659* 560 LAR----FVIDEACVSWGHDFRKYKRLNM-----LRKKFHSVPMALATAN-----PRVQKDIQNQLEMLKPVQFTMSFNRRHLKYDVLKPKKVMDCLEWIKKY-HPH 659  
*DmBlm/1-704* 583 TQGTTS GMDGDDLEGLLAEI DEHQMQARRSEFNGYSYKELEAVKVKKEKKEPINISLDDDGFEYDEAMFEQMHSQAANKSRVSSAGPSTSKSVVBTQTLSALHSQKLSGNFAN 704  
*KIBLM/1-621* 529 PK-----SLDTQLQTELVPVEVIEDD-----DFSMADLEPYMEET EKT-----RENSVQPYAWTSEMYHKLRLHVFGLDSFRPNQLEAVNATLQKDAFVLMPTGG 621  
*ScSgs1/1-674* 574 LER----FDEERENRTQVADIQELDNDLKIITER-----KLTDGNEHPSPWSPKIK-----REKSSVQKDEEDDFHDKFSLSDIVSKNSLSKNTGPTYPWSD EYLRLHEVF 674

Figure S1b

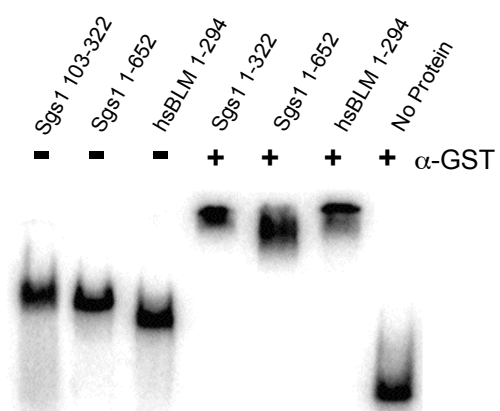

**Figure S2**

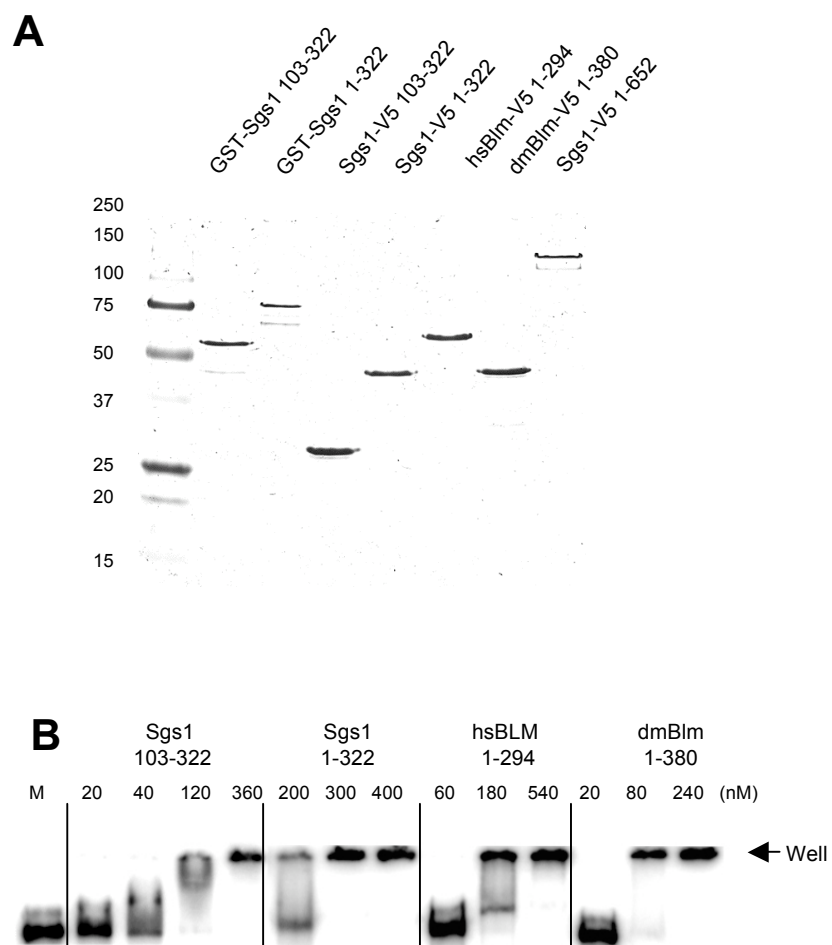

**Figure S3**

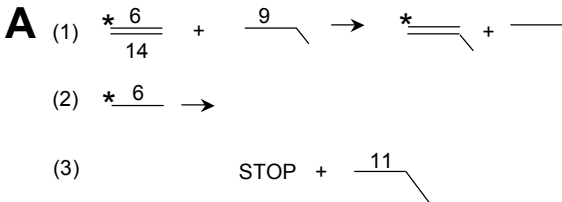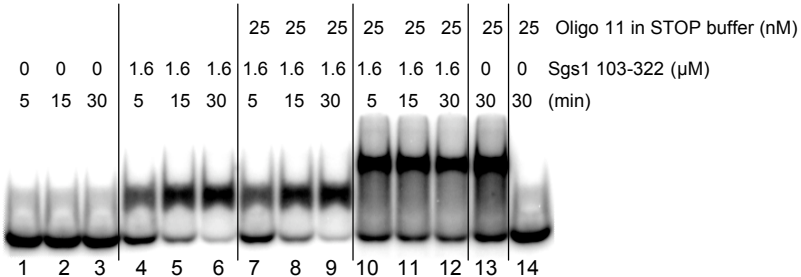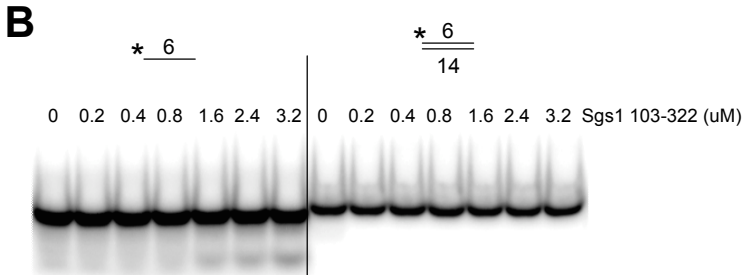

## Figure S4

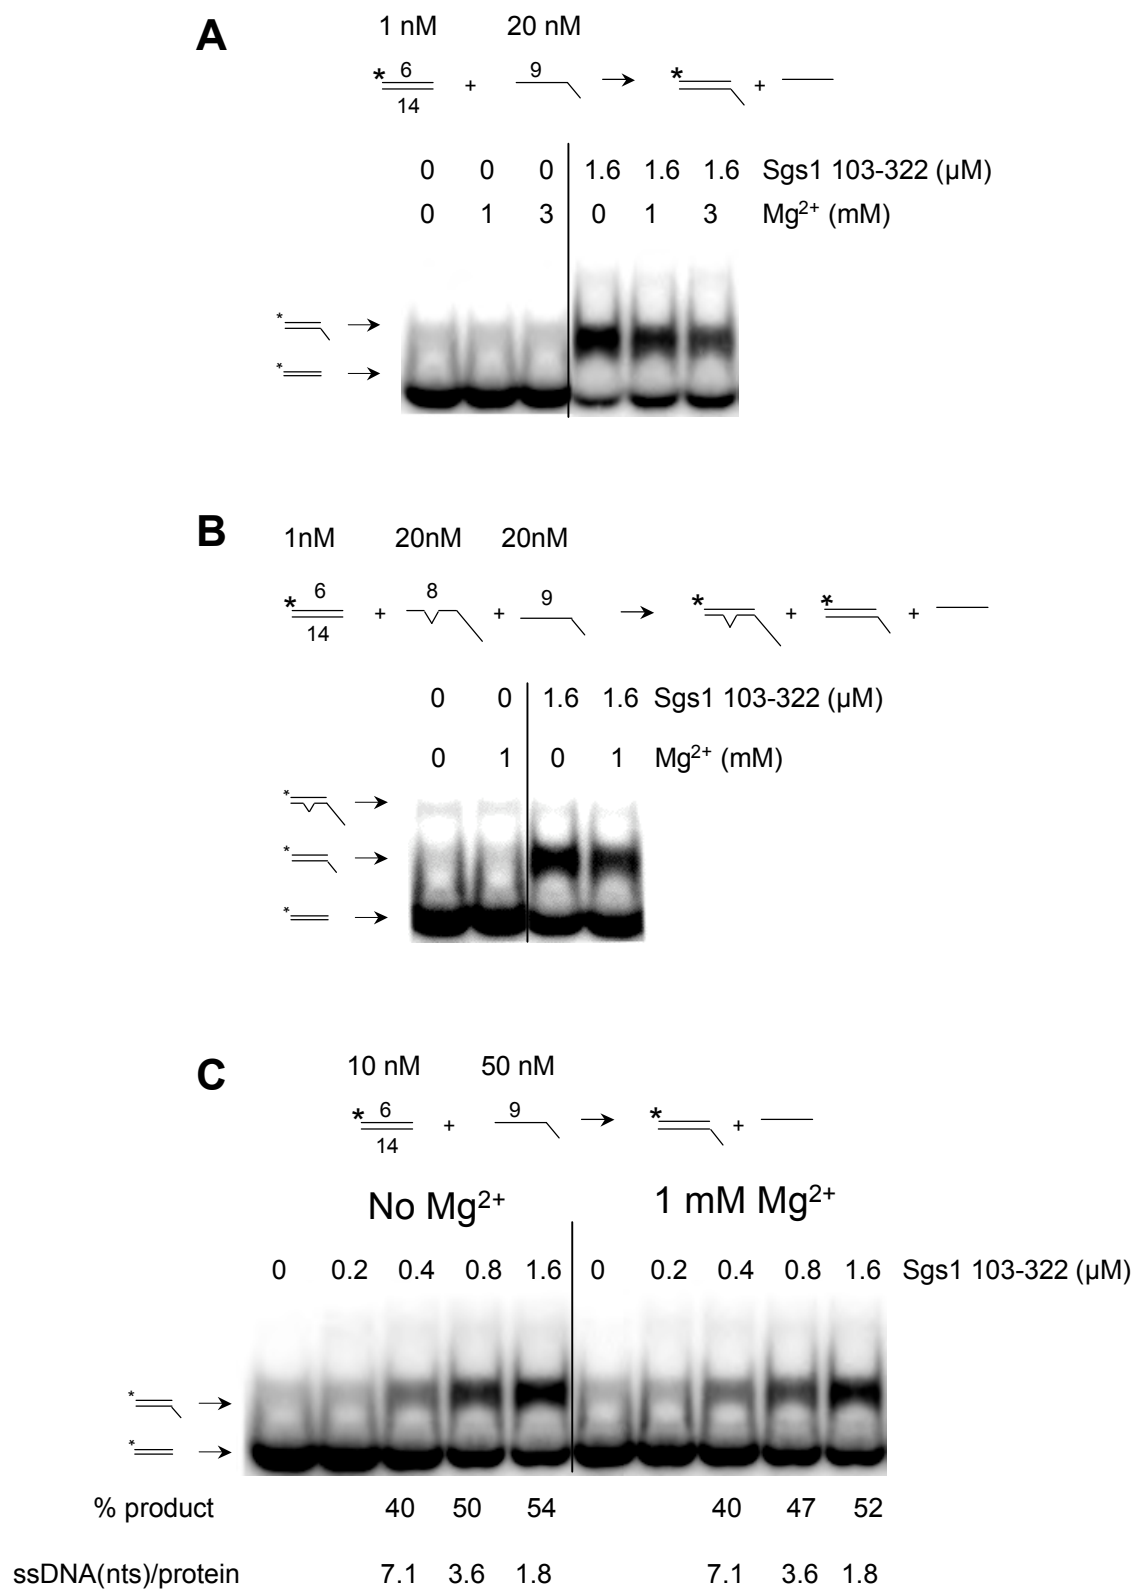

**Figure S5**

# Supplementary Table S1

## Oligonucleotides used in this study

| Oligo Name | Original name         | Size | DNA sequence (5'-3')                                                                                   |
|------------|-----------------------|------|--------------------------------------------------------------------------------------------------------|
| 1          | 1253                  | 50   | TGGGTCAACGTGGGCAAAGATGTCCTAGCAATGTAATCGTCTATGACGTT                                                     |
| 2          | 1254                  | 50   | TGCCGAATTCTACCAGTGCCAGTGATGGACATCTTTGCCACGTTGACCC                                                      |
| 3          | 2558                  | 25   | TGGGTCAACGTGGGCAAAGATGTCC                                                                              |
| 4          | 2559                  | 25   | GGACATCTTTGCCACGTTGACCCA                                                                               |
| 5          | 2600                  | 25   | TCACTGGCACTGGTAGAATTCGGCA                                                                              |
| 6          | 2625                  | 32   | TCCTTTTGATAAGAGGTCATTTTTGCGGATGG                                                                       |
| 7          | 2640                  | 32   | TCCTTTTGATAAGAGCTCATTTTTGCGGATGG                                                                       |
| 8          | 2651                  | 94   | CTTTAGCTGCATATTTACAACATGTTGACCTACAGCACCAGATT<br>CAGCAATTAAGCTCTAAGCCATCCGCAAAAATGAGCTCTTATCA<br>AAAGGA |
| 9          | 2655                  | 57   | CCAGATTCAGCAATTAAGCTCTATCCCATCCGCAAAAATGACCT<br>CTTATCAAAAGGA                                          |
| 10         | 2624                  | 57   | CCATCCGCAAAAATGACCTCTTATCAAAAGGATGGACATCTTTG<br>CCCACGTTGACCC                                          |
| 11         | 2626                  | 94   | CTTTAGCTGCATATTTACAACATGTTGACCTACAGCACCAGATT<br>CAGCAATTAAGCTCTAAGCCATCCGCAAAAATGACCTCTTATCA<br>AAAGGA |
| 12         | 2653                  | 34   | TCTCCTTTTGATAAGAGGTCATTTTTGCGGATGG                                                                     |
| 13         | 2654                  | 34   | TCCTTTTGATAAGAGGTCATTTTTGCGGATGGCT                                                                     |
| 14         | 2639                  | 32   | CCATCCGCAAAAATGACCTCTTATCAAAAGGA                                                                       |
| 15         | 2641                  | 32   | CCATCCGCAAAAATGAGCTCTTATCAAAAGGA                                                                       |
| 16         | 2129<br>(Phi-X174)    | 50   | AAAGGTCGCAAAGTAAGAGCTTCTCGAGCTGCGCAAGGATAGG<br>TCGAATT                                                 |
| 17         | 2044<br>(D-loop)      | 50   | CGTTCTTCGGGGCGAAACTCTCAAGGATCTTACCGCTGTTGA<br>GATCCAG                                                  |
| 18         | 1317<br>(DNA binding) | 90   | GATCCGAATTCTGGCTTGCTAGGACATCTTTGCCACGTTGACC<br>CGGGTTGGCGTTAGGAGATAGTCAGTTATAGCTGCGGCTGCTA<br>AGG      |
